# Supplementary material
Source: Research Square preprint supplement (doi:10.21203/rs.3.rs-9098945/v1)
Supplement: Supplementary file 1 [file 933eaf0dbcc914f26a11f8d4.docx]

Table 6 Results of the First Round of Expert Consultation

| ****EPA Performance Indicators**** | Importance | | | Feasibility | | |
| --- | --- | --- | --- | --- | --- | --- |
| Mean | Standard Deviation (SD) | Coefficient of Variation (CV) | Mean | Standard Deviation (SD) | Coefficient of Variation (CV) |
| The physician maintains a professional, dignified, and appropriate appearance and demeanor | 4.6327 | 0.7273 | 0.1570 | 4.8367 | 0.5143 | 0.1063 |
| Diagnostic and therapeutic tools are fully prepared and properly positioned | 4.5102 | 0.7671 | 0.1701 | 4.7551 | 0.5962 | 0.1254 |
| Establish a quiet and comfortable clinical consultation environment | 4.5510 | 0.7377 | 0.1621 | 4.5918 | 0.7615 | 0.1658 |
| Verify the patient’s basic demographic and administrative information | 4.8980 | 0.3677 | 0.0751 | 4.9796 | 0.1429 | 0.0287 |
| Utilize the SOCRATES mnemonic (****S****ite, ****O****nset, ****C****haracter, ****R****adiation, ****A****ssociated symptoms, ****T****iming, ****E****xacerbating/relieving factors, ****S****everity) for structured history taking | 4.6735 | 0.9440 | 0.2020 | 4.4490 | 0.9368 | 0.2106 |
| Collect comprehensive information on the patient’s disease course, diagnosis, and prior management | 4.8776 | 0.3312 | 0.0679 | 4.6327 | 0.6019 | 0.1299 |
| Conduct a thorough review of the patient’s past medical history, family history, reproductive history, and personal social history | 4.7959 | 0.4991 | 0.1041 | 4.7143 | 0.5774 | 0.1225 |
| Accurately identify modifiable and non-modifiable health risk factors | 4.8163 | 0.4862 | 0.1009 | 4.5306 | 0.6488 | 0.1432 |
| Conduct a biopsychosocial holistic history assessment | 4.7755 | 0.4684 | 0.0981 | 4.4490 | 0.7089 | 0.1593 |
| Apply the RICE mnemonic for rapid clinical assessment | 4.6531 | 0.9254 | 0.1989 | 4.4286 | 1.0206 | 0.2305 |
| Use open-ended questioning to elicit and attentively listen to the patient’s chief complaint | 4.7143 | 0.6124 | 0.1299 | 4.4286 | 0.8660 | 0.1956 |
| Integrate general physical examination with focused assessment of relevant systems | 4.9592 | 0.1999 | 0.0403 | 4.7755 | 0.5502 | 0.1152 |
| Demonstrate standardized and proficient performance of physical examination techniques | 4.8571 | 0.3536 | 0.0728 | 4.7143 | 0.5000 | 0.1061 |
| Maintain clear communication with the patient during examination and prioritize patient comfort | 4.8163 | 0.3912 | 0.0812 | 4.7551 | 0.5216 | 0.1097 |
| Implement appropriate privacy protection measures during examination | 4.8776 | 0.3312 | 0.0679 | 4.8163 | 0.4862 | 0.1009 |
| Select diagnostic tests based on clinical indication and evidence-based principles | 4.9184 | 0.2766 | 0.0562 | 4.6531 | 0.5609 | 0.1205 |
| Inform the patient of pre-test precautions in advance to ensure patient safety | 4.7959 | 0.4991 | 0.1041 | 4.7347 | 0.5313 | 0.1122 |
| Explain the rationale and expected benefits of diagnostic tests to the patient | 4.8163 | 0.3912 | 0.0812 | 4.7959 | 0.4991 | 0.1041 |
| Coordinate effectively with external facilities for referred diagnostic tests | 4.2245 | 0.9846 | 0.2331 | 4.1224 | 1.0534 | 0.2555 |
| Accurately interpret diagnostic test results and correlate findings with clinical context | 4.8980 | 0.3677 | 0.0751 | 4.7347 | 0.5313 | 0.1122 |
| Proactively greet the patient and introduce oneself with clear role clarification | 4.7551 | 0.4800 | 0.1010 | 4.8163 | 0.4413 | 0.0916 |
| Use plain, accessible language and minimize unnecessary medical jargon | 4.8571 | 0.3536 | 0.0728 | 4.6939 | 0.5084 | 0.1083 |
| Utilize non-verbal communication skills | 4.6735 | 0.5548 | 0.1187 | 4.3878 | 0.7587 | 0.1729 |
| Provide timely feedback and confirmation of information to the patient | 4.7755 | 0.4684 | 0.0981 | 4.6735 | 0.5548 | 0.1187 |
| Maintain an appropriate tone, volume, and pace of speech | 4.7755 | 0.4216 | 0.0883 | 4.5510 | 0.6475 | 0.1423 |
| Demonstrate empathy and provide appropriate emotional support to the patient | 4.8571 | 0.3536 | 0.0728 | 4.7143 | 0.5401 | 0.1146 |
| Demonstrate proficiency in breaking bad news effectively | 4.7755 | 0.4216 | 0.0883 | 4.4490 | 0.6789 | 0.1526 |
| Respect patient autonomy and facilitate shared decision-making | 4.8571 | 0.4082 | 0.0841 | 4.6122 | 0.6395 | 0.1387 |
| Respect cultural diversity and provide culturally sensitive care | 4.4898 | 0.7107 | 0.1583 | 4.3673 | 0.7273 | 0.1665 |
| Respond patiently to the patient’s non-medical questions and concerns | 4.2041 | 0.7900 | 0.1879 | 4.1633 | 0.8253 | 0.1982 |
| Address the unique needs of vulnerable patients | 4.4898 | 0.6494 | 0.1446 | 4.2857 | 0.7638 | 0.1782 |
| Proactively provide care navigation and guidance on follow-up or additional care | 4.4490 | 0.9802 | 0.2203 | 4.4286 | 0.9789 | 0.2211 |
| Adhere to the ethical principles of justice and beneficence | 4.7959 | 0.4555 | 0.0950 | 4.5714 | 0.6770 | 0.1481 |
| Demonstrate competence in managing ethical dilemmas in clinical practice | 4.6531 | 0.5969 | 0.1283 | 4.2449 | 0.8299 | 0.1955 |
| Apply systematic reasoning for diagnosis and differential diagnosis of common symptoms | 4.9184 | 0.2766 | 0.0562 | 4.7347 | 0.5313 | 0.1122 |
| Utilize evidence-based medicine (EBM) principles in clinical decision-making | 4.8367 | 0.3734 | 0.0772 | 4.4694 | 0.6801 | 0.1522 |
| Develop a scientific, evidence-based, and individualized treatment plan | 4.9388 | 0.2422 | 0.0490 | 4.6122 | 0.5707 | 0.1237 |
| Ensure the treatment plan is cost-effective and avoids unnecessary resource utilization | 4.7347 | 0.4906 | 0.1036 | 4.4898 | 0.6808 | 0.1516 |
| Integrate pharmacotherapy with non-pharmacological interventions | 4.7551 | 0.8299 | 0.1745 | 4.5306 | 0.9811 | 0.2166 |
| Identify and justify appropriate referral criteria for higher-level care | 4.8776 | 0.3312 | 0.0679 | 4.5918 | 0.6745 | 0.1469 |
| Recognize signs and symptoms of acute and critical illnesses promptly | 4.9592 | 0.1999 | 0.0403 | 4.6735 | 0.5912 | 0.1265 |
| Initiate timely and appropriate management of acute and critical conditions | 4.7959 | 0.4991 | 0.1041 | 4.6122 | 0.6061 | 0.1314 |
| Manage patients with multiple comorbidities effectively | 4.8571 | 0.3536 | 0.0728 | 4.5102 | 0.6808 | 0.1509 |
| Ability to manage undifferentiated/uncertain medical conditions | 4.7551 | 0.4345 | 0.0914 | 4.3265 | 0.7469 | 0.1726 |
| Infectious disease prevention and control | 4.6939 | 0.8709 | 0.1855 | 4.4694 | 0.9377 | 0.2098 |
| Assess the patient’s health risks | 4.8367 | 0.3734 | 0.0772 | 4.6327 | 0.6019 | 0.1299 |
| Provide personalized preventive strategies | 4.8367 | 0.3734 | 0.0772 | 4.6122 | 0.6061 | 0.1314 |
| Dynamic management of community health records | 4.7143 | 0.5774 | 0.1225 | 4.5102 | 0.7671 | 0.1701 |
| Develop a rational and tailored follow-up plan | 4.8163 | 0.4413 | 0.0916 | 4.6735 | 0.6254 | 0.1338 |
| Provide continuous medication adherence counseling | 4.7551 | 0.7226 | 0.1520 | 4.5714 | 0.8416 | 0.1841 |
| Assess family resources to support patient self-management | 4.6939 | 0.5084 | 0.1083 | 4.2857 | 0.8898 | 0.2076 |
| Coordinate community resources to support patient self-management | 4.6531 | 0.5225 | 0.1123 | 4.1429 | 0.9354 | 0.2258 |
| Ability to organize multidisciplinary team (MDT) consultations | 4.6327 | 0.5281 | 0.1140 | 4.2041 | 0.8893 | 0.2115 |
| Ability to coordinate tiered referral and care escalation | 4.6327 | 0.8826 | 0.1905 | 4.2449 | 1.0314 | 0.2430 |
| Document comprehensive and accurate outpatient medical records that reflect clinical reasoning | 4.8571 | 0.3536 | 0.0728 | 4.6122 | 0.6061 | 0.1314 |
| Complete outpatient medical records in a timely and standardized manner | 4.8776 | 0.3312 | 0.0679 | 4.7551 | 0.5216 | 0.1097 |
| Write outpatient prescriptions with complete content and standardized formatting | 4.8776 | 0.3312 | 0.0679 | 4.8571 | 0.3536 | 0.0728 |
| Ensure accuracy in outpatient prescription writing | 4.7755 | 0.8232 | 0.1724 | 4.7347 | 0.8606 | 0.1818 |

Table 7 Results of the Second Round of Expert Consultation

| ****EPA Performance Indicators**** | Importance | | | Feasibility | | |
| --- | --- | --- | --- | --- | --- | --- |
| Mean | Standard Deviation (SD) | Coefficient of Variation (CV) | Mean | Standard Deviation (SD) | Coefficient of Variation (CV) |
| Maintains professional appearance and demeanor | 4.5394 | 0.7800 | 0.1718 | 4.8844 | 0.3669 | 0.0751 |
| Adheres to standard personal protective equipment protocols | 4.6227 | 0.7456 | 0.1613 | 4.7154 | 0.5256 | 0.1115 |
| Ensures clinical equipment is fully prepared and properly positioned | 4.3990 | 0.8021 | 0.1823 | 4.7284 | 0.5557 | 0.1175 |
| Establishes a quiet and comfortable clinical environment | 4.3530 | 0.8190 | 0.1882 | 4.4465 | 0.7561 | 0.1700 |
| Reviews the patient’s prior clinical history records | 4.6933 | 0.6725 | 0.1433 | 4.6745 | 0.4935 | 0.1056 |
| Obtains basic information related to the current consultation | 4.7424 | 0.6591 | 0.1390 | 4.7905 | 0.4410 | 0.0921 |
| Verifies the patient’s basic demographic information | 4.7652 | 0.5081 | 0.1066 | 4.8044 | 0.4838 | 0.1007 |
| Comprehensively collects present illness history | 4.9167 | 0.2501 | 0.0509 | 4.6639 | 0.5009 | 0.1074 |
| Thoroughly reviews relevant historical data (past medical, family, reproductive, and personal histories) | 4.6995 | 0.4382 | 0.0932 | 4.6561 | 0.4996 | 0.1073 |
| Assesses the patient’s psychological status | 4.5827 | 0.5200 | 0.1135 | 4.3251 | 0.7017 | 0.1622 |
| Collects comprehensive social context information | 4.4329 | 0.6601 | 0.1489 | 4.1659 | 0.7048 | 0.1692 |
| Selects appropriate physical examination items based on clinical context | 4.8706 | 0.3295 | 0.0676 | 4.6668 | 0.5781 | 0.1239 |
| Performs physical examination with standardization and proficiency | 4.8869 | 0.3046 | 0.0623 | 4.6431 | 0.5459 | 0.1176 |
| Prioritizes patient comfort and maintains privacy protection during the examination | 4.8697 | 0.3103 | 0.0637 | 4.7766 | 0.4515 | 0.0945 |
| Selects appropriate diagnostic tests based on clinical context | 4.9383 | 0.2111 | 0.0427 | 4.6493 | 0.5467 | 0.1176 |
| Explains the purpose of diagnostic tests to the patient and informs them of pre-test precautions | 4.7392 | 0.4753 | 0.1003 | 4.6950 | 0.5240 | 0.1116 |
| Interprets diagnostic test results accurately | 4.9489 | 0.2012 | 0.0407 | 4.7660 | 0.4033 | 0.0846 |
| Initiates greetings and introduces oneself to the patient | 4.5003 | 0.6657 | 0.1479 | 4.6346 | 0.7666 | 0.1654 |
| Uses plain language and avoids excessive medical jargon | 4.7474 | 0.4586 | 0.0966 | 4.5147 | 0.5955 | 0.1319 |
| Utilizes nonverbal communication techniques | 4.6653 | 0.4998 | 0.1071 | 4.3476 | 0.6118 | 0.1407 |
| Provides timely feedback and confirms information shared by the patient | 4.6440 | 0.5452 | 0.1174 | 4.5207 | 0.6653 | 0.1472 |
| Maintains appropriate tone, volume, and pace of speech | 4.6257 | 0.5510 | 0.1191 | 4.4938 | 0.7517 | 0.1673 |
| Demonstrates empathy and provides appropriate emotional support to the patient | 4.8627 | 0.3305 | 0.0680 | 4.6242 | 0.6241 | 0.1350 |
| Communicates patient condition information effectively (including both positive and adverse updates) | 4.7893 | 0.3885 | 0.0811 | 4.4933 | 0.5972 | 0.1329 |
| Uses a combination of open-ended and closed-ended questions to elicit patient concerns | 4.7097 | 0.4844 | 0.1028 | 4.3949 | 0.6883 | 0.1566 |
| Respects patient autonomy and cultural background to facilitate shared decision-making | 4.8216 | 0.4108 | 0.0852 | 4.4105 | 0.7178 | 0.1628 |
| Navigates ethical dilemmas flexibly | 4.5546 | 0.5953 | 0.1307 | 4.1255 | 0.7416 | 0.1798 |
| Adheres to the principles of justice and beneficence | 4.7420 | 0.4754 | 0.1003 | 4.4349 | 0.7499 | 0.1691 |
| Identifies and addresses the patient’s specific needs | 4.6529 | 0.4997 | 0.1074 | 4.3238 | 0.7045 | 0.1629 |
| Demonstrates logical diagnostic and differential diagnostic reasoning for common symptoms | 4.9164 | 0.2630 | 0.0535 | 4.6319 | 0.5496 | 0.1187 |
| Applies evidence-based medicine principles in clinical diagnosis | 4.7549 | 0.4185 | 0.0880 | 4.4079 | 0.6898 | 0.1565 |
| Comprehensive diagnosis without omissions | 4.6847 | 0.7033 | 0.1501 | 4.2353 | 0.8656 | 0.2044 |
| Accurately identifies the primary diagnosis or main clinical problem | 4.6224 | 0.5108 | 0.1105 | 4.2382 | 0.8418 | 0.1986 |
| Develops evidence-based, personalized treatment plans | 4.8113 | 0.3732 | 0.0776 | 4.4989 | 0.6378 | 0.1418 |
| Selects medications that are safely tailored to the patient’s individual characteristics | 4.8228 | 0.6226 | 0.1291 | 4.4558 | 0.7231 | 0.1623 |
| Identifies drug-drug interactions in polypharmacy to ensure therapeutic efficacy and safety | 4.8416 | 0.3517 | 0.0726 | 4.3688 | 0.7402 | 0.1694 |
| Selects treatment plans that align with the patient’s economic circumstances | 4.7253 | 0.4749 | 0.1005 | 4.4676 | 0.6293 | 0.1409 |
| Appropriately utilizes non-pharmacological interventions | 4.7089 | 0.4843 | 0.1028 | 4.5467 | 0.6355 | 0.1398 |
| Assesses and manages the risk of acute/critical conditions | 4.9154 | 0.2508 | 0.0510 | 4.5414 | 0.5638 | 0.1241 |
| Evaluates and addresses comorbidity-related risks | 4.8077 | 0.3729 | 0.0776 | 4.4692 | 0.6932 | 0.1551 |
| Manages clinical scenarios where symptoms are inconsistent with diagnostic test results | 4.7502 | 0.4174 | 0.0879 | 4.2505 | 0.7377 | 0.1735 |
| MDT Need Assessment Competency | 4.5815 | 0.5190 | 0.1133 | 4.1574 | 0.8378 | 0.2015 |
| Provides health education and health promotion strategies tailored to the patient’s condition | 4.8155 | 0.3725 | 0.0774 | 4.5880 | 0.6310 | 0.1375 |
| Offers guidance on infectious disease prevention | 4.7542 | 0.4637 | 0.0975 | 4.5087 | 0.6641 | 0.1473 |
| Maintains dynamic management of community health records (within network-accessible scope) | 4.7672 | 0.4520 | 0.0948 | 4.3341 | 0.7357 | 0.1698 |
| Develops a rational follow-up plan | 4.8722 | 0.3713 | 0.0762 | 4.6068 | 0.5921 | 0.1285 |
| Produces comprehensive, accurate outpatient medical records that reflect general practice reasoning | 4.8640 | 0.3295 | 0.0677 | 4.5941 | 0.6872 | 0.1496 |
| Completes outpatient medical records in a timely manner and adheres to standardized formatting | 4.8574 | 0.3309 | 0.0681 | 4.7288 | 0.6268 | 0.1325 |
| Produces complete content in outpatient prescriptions | 4.8595 | 0.3303 | 0.0680 | 4.7525 | 0.6179 | 0.1300 |
| Ensures the accuracy of outpatient prescription content | 4.9195 | 0.2463 | 0.0501 | 4.7096 | 0.6336 | 0.1345 |
